# Supplementary material
Source: PubMed Central journal article supplement (PMC1326174)

### 32D cell line

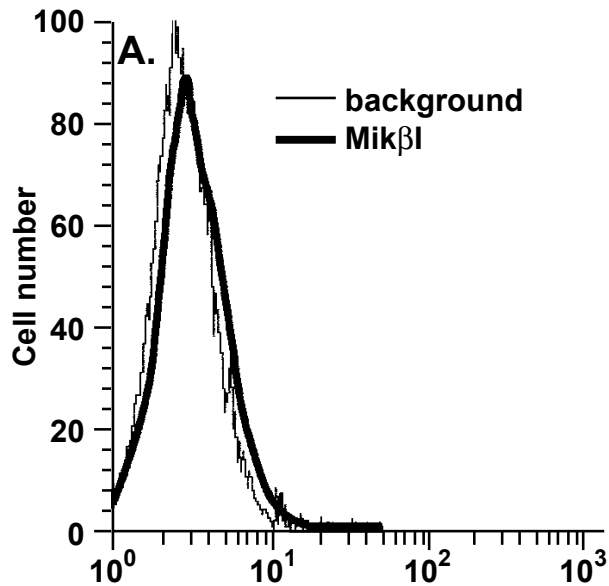

### 32D $\beta$ cell line

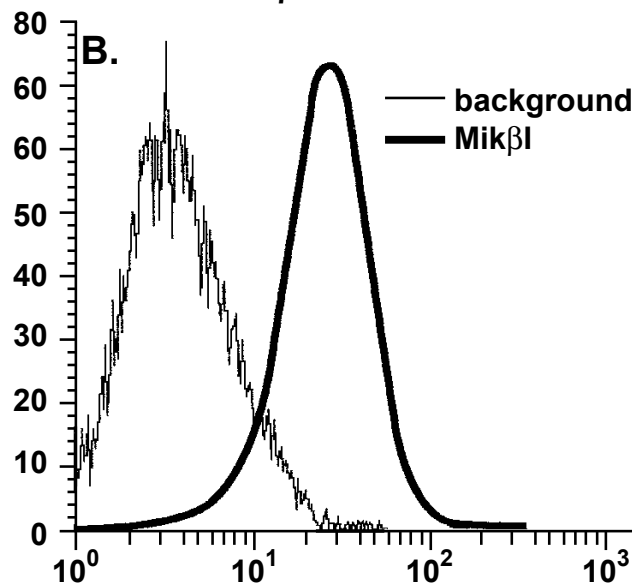

Relative mean fluorescence intensity

Supplement: pnas_0509575103_1.pdf [file pnas_0509575103_1.pdf]
